# Supplementary figures and images for: A dystrophic muscle broadens the contribution and activation of immune cells reacting to rAAV gene transfer
Source: PubMed Central journal article supplement — Gene Ther. 2014 Jul 17;21(9):828–39. doi: 10.1038/gt.2014.61 (PMC4283385; doi:10.1038/gt.2014.61), 2014-07-17

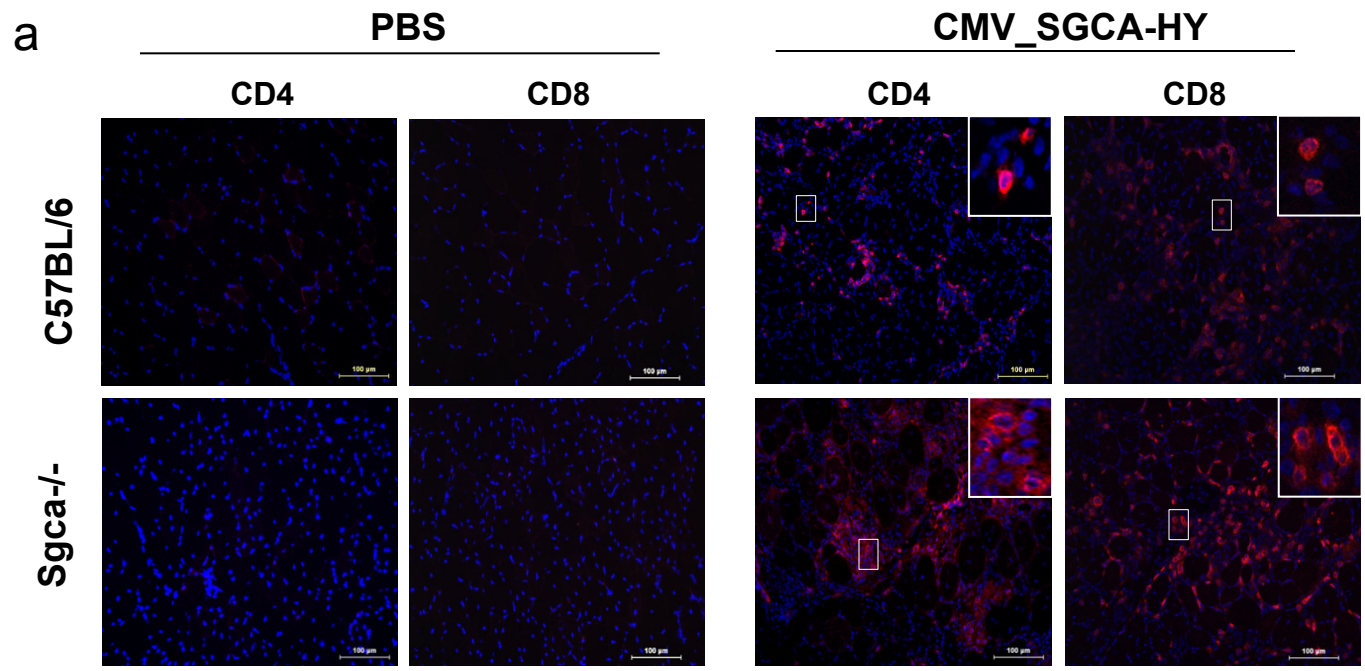

Supplement: gt201461x1.pdf [file gt201461x1.pdf]
